# Supplementary material
Source: publisher site journal article supplement (https://www.dovepress.com/article/478377)
Supplement: Supplementary file 1 [file get_supplementary_file.php]

**Supplemental Table 1** List of genes identified for patient responders according to Mind.Px™ US-patent.15

| Biologic Mechanism of Action | Genes |
| --- | --- |
| TNFa-i | CNFN, CTSC, GBAP1, CRABP2, PCDH7, PPIG, RAB31, C3, EGR1 |
| IL-17i | SERPINB3, SERPINB4, S100A7A, PI3, KRT6A, LCN, DEFB4A, DEFB4B, SPRR1A, IL36G, MX1, IF127, CD36, CD24, IL4R |
| IL-23i | LLPH, HAL, TXNRD1, AC08993.1, EID3, RNASE7, DAD1, JAG2, KIFC3, SMPD3, PLCD3 |
